# Supplementary material
Source: PubMed Central journal article supplement (PMC4104153)
Supplement: NIHMS604737-supplement-Supplemental_Materials.pdf [file NIHMS604737-supplement-Supplemental_Materials.pdf]

## Rare Copy Number Variation in Treatment-Resistant Major Depressive Disorder

*Supplemental Information***Table S1.** Burden of deletions and duplications in individuals with treatment-resistant major depressive disorder, by study cohort

| Deletions    | i2b2 cohort         |       |                    |                         |                    | STAR*D cohort       |              |                    |                         |                    |
|--------------|---------------------|-------|--------------------|-------------------------|--------------------|---------------------|--------------|--------------------|-------------------------|--------------------|
|              | CNV burden (number) |       |                    | CNV burden (gene count) |                    | CNV burden (number) |              |                    | CNV burden (gene count) |                    |
|              | total               | P     | case/control ratio | P                       | case/control ratio | total               | P            | case/control ratio | P                       | case/control ratio |
| all          | 261                 | 0.981 | 0.756              | 0.941                   | 0.617              | 286                 | 0.853        | 0.851              | 0.989                   | 0.473              |
| frequency    |                     |       |                    |                         |                    |                     |              |                    |                         |                    |
| 1            | 131                 | 0.896 | 0.778              | 0.956                   | 0.440              | 106                 | 0.620        | 0.865              | 0.919                   | 0.372              |
| 2-6          | 81                  | 0.920 | 0.753              | 0.982                   | 0.415              | 139                 | 0.811        | 0.885              | 0.900                   | 0.644              |
| size (kb)    |                     |       |                    |                         |                    |                     |              |                    |                         |                    |
| 100-200      | 159                 | 0.997 | 0.610              | 0.997                   | 0.403              | 200                 | 0.634        | 0.939              | 0.694                   | 0.841              |
| 200-500      | 85                  | 0.528 | 1.011              | 0.920                   | 0.494              | 65                  | 0.878        | 0.716              | 0.977                   | 0.353              |
| 500+         | 17                  | 0.503 | 1.115              | 0.412                   | 1.187              | 21                  | 0.935        | 0.516              | 0.961                   | 0.124              |
| <hr/>        |                     |       |                    |                         |                    |                     |              |                    |                         |                    |
| Duplications | i2b2 cohort         |       |                    |                         |                    | STAR*D cohort       |              |                    |                         |                    |
|              | CNV burden (number) |       |                    | CNV burden (gene count) |                    | CNV burden (number) |              |                    | CNV burden (gene count) |                    |
|              | total               | P     | case/control ratio | P                       | case/control ratio | total               | P            | case/control ratio | P                       | case/control ratio |
| all          | 390                 | 0.419 | 1.040              | <b>0.048</b>            | <b>1.501</b>       | 390                 | 0.209        | 1.108              | 0.319                   | 1.099              |
| frequency    |                     |       |                    |                         |                    |                     |              |                    |                         |                    |
| 1            | 175                 | 0.191 | 1.195              | 0.113                   | 1.525              | 150                 | 0.320        | 1.095              | 0.620                   | 0.883              |
| 2-6          | 140                 | 0.682 | 0.941              | 0.157                   | 1.433              | 176                 | 0.460        | 1.049              | 0.548                   | 1.001              |
| size (kb)    |                     |       |                    |                         |                    |                     |              |                    |                         |                    |
| 100-200      | 219                 | 0.592 | 0.973              | <b>0.049</b>            | <b>1.672</b>       | 171                 | 0.630        | 0.957              | 0.598                   | 0.959              |
| 200-500      | 126                 | 0.291 | 1.120              | 0.294                   | 1.188              | 139                 | 0.433        | 1.049              | 0.669                   | 0.894              |
| 500+         | 45                  | 0.370 | 1.164              | 0.150                   | 1.644              | 80                  | <b>0.022</b> | <b>1.620</b>       | 0.174                   | 1.464              |

**Table S2.** Results in loci known to be associated with schizophrenia or autism

| Region       | Type | p(control) | STAR*D<br>case:control | i2b2<br>case:control | Observed | Expected |
|--------------|------|------------|------------------------|----------------------|----------|----------|
| 1q21.1       | del  | 0.020%     | 0:0                    | 0:1                  | 1        | 0.25     |
| 1q21.1       | dup  | 0.030%     | 0:1                    | 0:1                  | 2        | 0.38     |
| 3q29         | del  | 0.002%     | 0:0                    | 0:0                  | 0        | 0.03     |
| 7q11.23      | del  | 0.000%     | 0:0                    | 0:0                  | 0        | 0.00     |
| 7q11.23      | dup  | 0.000%     | 0:0                    | 0:0                  | 0        | 0.00     |
| 7q36.3       | dup  | 0.060%     | 1:0                    | 0:0                  | 1        | 0.76     |
| 15q11.2      | del  | 0.270%     | 2:2                    | 2:0                  | 6        | 3.41     |
| 15q11.2-13.1 | dup  | 0.009%     | 0:0                    | 0:0                  | 0        | 0.11     |
| 15q13.3      | del  | 0.020%     | 0:0                    | 0:0                  | 0        | 0.25     |
| 16p13.11     | dup  | 0.130%     | 1:1                    | 1:0                  | 3        | 1.64     |
| 16p11.2      | del  | 0.040%     | 0:0                    | 0:0                  | 0        | 0.51     |
| 16p11.2      | dup  | 0.030%     | 0:1                    | 0:0                  | 1        | 0.38     |
| 17p12        | del  | 0.020%     | 0:0                    | 0:1                  | 1        | 0.25     |
| 17q12        | del  | 0.006%     | 0:0                    | 0:2                  | 2        | 0.08     |
| 22q11.21     | del  | 0.000%     | 0:0                    | 0:0                  | 0        | 0.00     |
| 22q11.2      | dup  | 0.080%     | 1:0                    | 1:0                  | 2        | 1.01     |
|              |      |            | 5:5                    | 4:5                  | 19       | 9.06     |

Prevalence's drawn from Malhotra and Sebat:

Malhotra D, Sebat J (2012): CNVs: harbingers of a rare variant revolution in psychiatric genetics. *Cell*. 148:1223-41.
